# Supplementary material for: Quantification of plasma phosphorylated tau to use as a biomarker for brain Alzheimer pathology: pilot case-control studies including patients with Alzheimer’s disease and down syndrome
Source: Springer Nature journal article supplement (doi:10.1186/s13024-017-0206-8), 2017-08-23
Supplement: MOESM2 [file 14976536]

**Supplementary table 1. Intra-assay precision (n = 18)**

|              | Sample 1 | Sample 2 | Sample 3 |
|--------------|----------|----------|----------|
| Mean (pg/ml) | 0.0660   | 0.098    | 0.6613   |
| SD           | 0.0074   | 0.0105   | 0.0183   |
| CV(%)        | 11.2     | 10.7     | 2.8      |
