# Supplementary material for: Quantification of plasma phosphorylated tau to use as a biomarker for brain Alzheimer pathology: pilot case-control studies including patients with Alzheimer’s disease and down syndrome
Source: Springer Nature journal article supplement (doi:10.1186/s13024-017-0206-8), 2017-08-23
Supplement: MOESM3 [file 14976536]

**Supplementary table 2. Inter-assay precision for quality control samples (n = 12)**

|              | Sample 1 | Sample 2 | Sample 3 | Sample 4 | Sample 5 | Sample 6 |
|--------------|----------|----------|----------|----------|----------|----------|
| Mean (pg/ml) | 0.1270   | 0.0721   | 0.0402   | 0.0188   | 0.0108   | 0.0102   |
| SD           | 0.0048   | 0.0044   | 0.0034   | 0.0012   | 0.0011   | 0.0004   |
| CV(%)        | 3.8      | 6.1      | 8.5      | 6.5      | 10.4     | 4.2      |
